# Supplementary figures and images for: Study on the catalytic performance of ZnCrAl co-precipitated oxides washed with ammonium carbonate solution in the synthesis of light olefins from syngas
Source: Royal Society of Chemistry journal article supplement (doi:10.1039/d4nj00947a), 2024-01-01

EDS

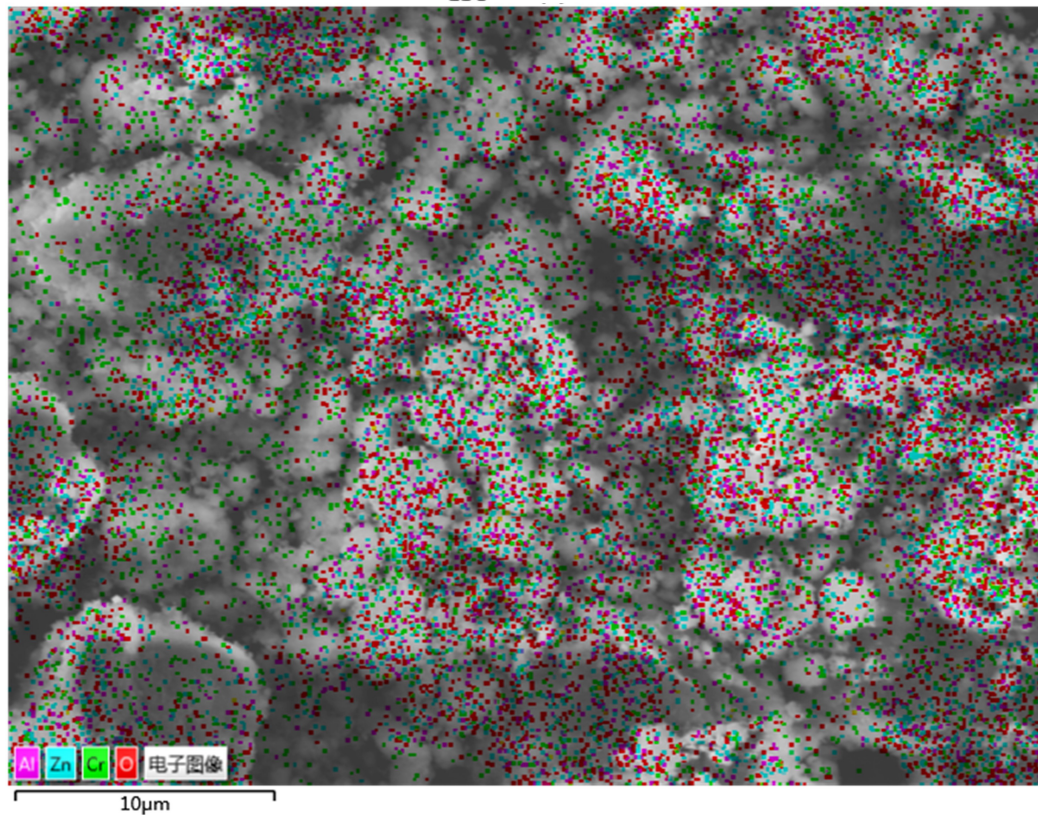

Zn Lα1\_2

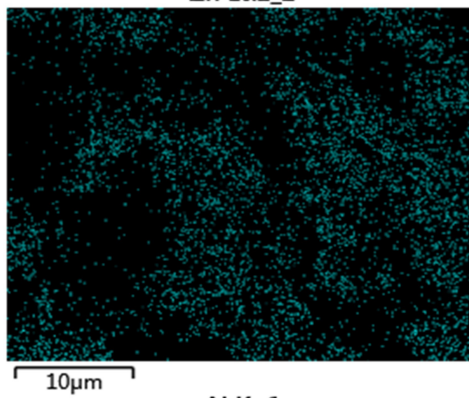

Cr Kα1

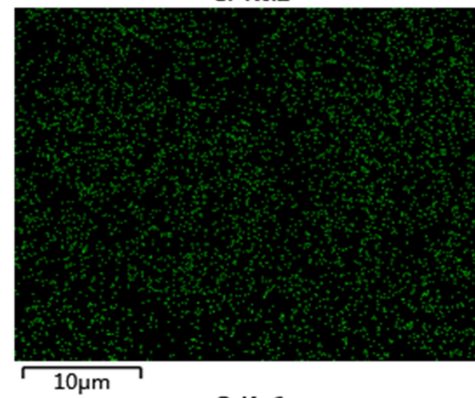

Al Kα1

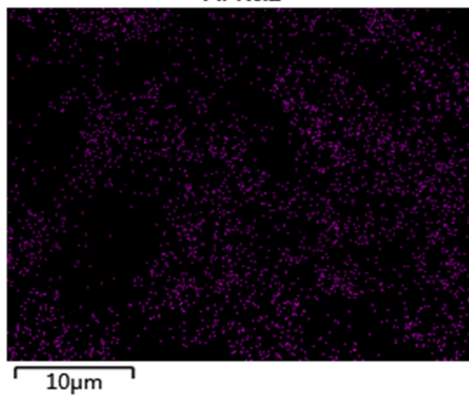

O Kα1

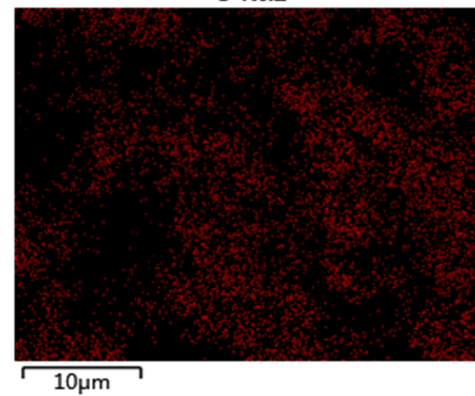

Supplement: d4nj00947a1.pdf [file d4nj00947a1.pdf]

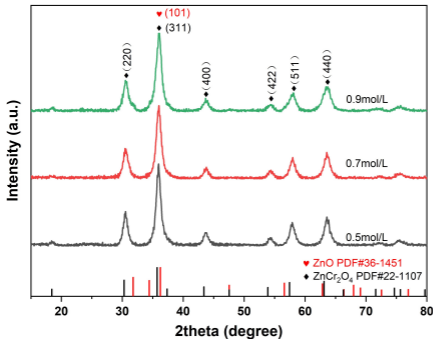

Supplement: d4nj00947a2.pdf [file d4nj00947a2.pdf]

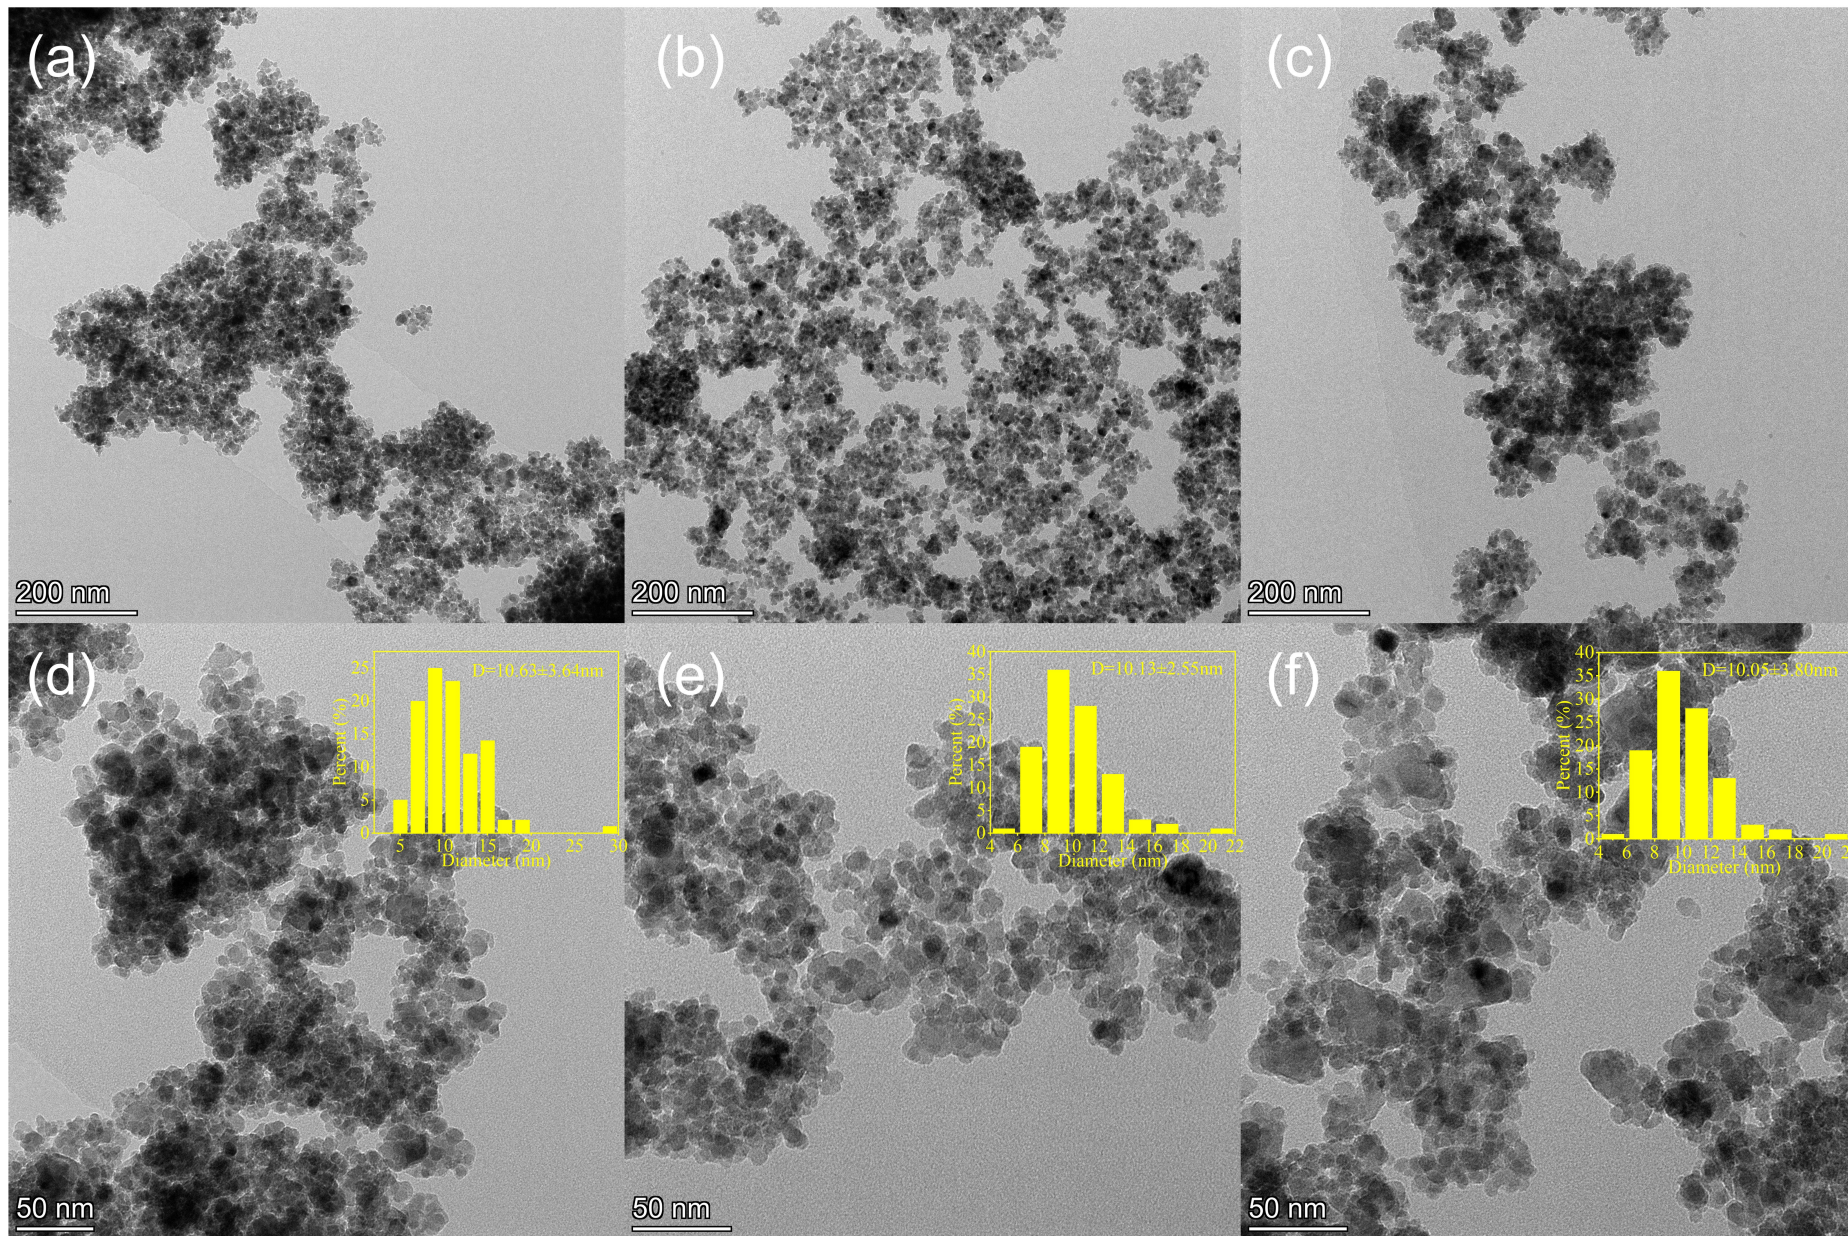

Supplement: d4nj00947a3.pdf [file d4nj00947a3.pdf]

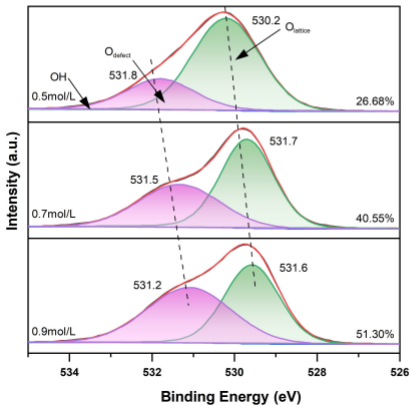

Supplement: d4nj00947a4.pdf [file d4nj00947a4.pdf]
